# Supplementary material
Source: Elsevier journal article supplement (https://www.sciencedirect.com/science/article/pii/S1699258X1830264X)
Supplement: mmc1 [file S1699258X1830264X:mmc1.docx]

MATERIAL SUPLEMENTARIO

Tabla . Actos médicos, diagnósticos y terapéuticos en Reumatología: consultas.

| **Consultas** | **Definición** |
| --- | --- |
| ***Consultas reumatológicas*** |  |
| Primera visita | Valoración médica inicial realizada por el reumatólogo y en el ámbito físico de consultas externas, de un paciente que acude por un problema o cuestión potencialmente reumatológica. |
| Segunda visita | Valoración médica inmediatamente posterior a la inicial realizada por el especialista reumatólogo y en el ámbito físico de consultas externas, de un paciente que ha acudido por un problema o cuestión reumatológica. |
| Visitas sucesivas | Valoraciones médicas, correlativas y tras la inicial realizada por el especialista reumatólogo y en el ámbito físico de consultas externas, de un paciente que ha acudido por un problema o cuestión reumatológica. |
| ***Consultas hospitalarias reumatológicas*** |  |
| Primera visita del paciente hospitalizado | Valoración médica inicial, por parte del especialista reumatólogo y en ámbito hospitalario, de un paciente que ha sido ingresado a cargo del servicio de Reumatología. |
| Visitas sucesivas del paciente hospitalizado | Valoraciones médicas, correlativas y tras la inicial realizada por el especialista reumatólogo y en ámbito hospitalario, de un paciente ingresado a cargo del servicio de Reumatología. |
| Visita de alta del paciente hospitalizado | Valoración médica final realizada por el especialista reumatólogo, en ámbito hospitalario y tras alcanzar, cuando menos, alguna resolución médicamente razonable para la patología reumatológica que originó el ingreso inicial a cargo del servicio de Reumatología. |
| Primera visita interconsulta del paciente  hospitalizado | Valoración médica inicial, generalmente in situ, que realiza el especialista reumatólogo tras solicitud oficial por parte del facultativo o servicio responsable del paciente en cuestión y acerca de alguna cuestión o problema potencialmente reumatológico. |
| Visitas sucesivas interconsulta | Valoraciones médicas realizadas por el especialista reumatólogo, correlativas y tras la inicial, en calidad de seguimiento y hasta alcanzar, cuando menos, algún tipo de resolución médicamente razonable, de la cuestión o problema que originó la interconsulta inicial. |
| Visita de alta interconsulta | Valoración médica final realizada por el especialista reumatólogo tras alcanzar, cuando menos, alguna resolución médicamente razonable para el problema o cuestión que originó la interconsulta inicial. |
| Hospital de día: Valoración y tratamiento  del paciente | Visita médica realizada por el especialista reumatólogo en el Hospital de Día y con el objetivo de administrar algún tipo de tratamiento endovenoso para el proceso reumatológico. |
| Hospital de día: Control post tratamiento y  alta del paciente | Valoración médica realizada por el especialista reumatólogo de un paciente que ha recibido tratamiento endovenoso en el Hospital de Día y que se halla en condiciones de recibir el alta médica de éste, por finalización de dicha terapia. |
| Hospital de día: seguimiento telefónico  del paciente | Valoración médica realizada por el especialista reumatólogo, aislada o periódica, de un paciente que recibe o ha recibido tratamiento endovenoso en Hospital de Día por su patología, generalmente reumatológica. Suele evaluarse la respuesta al tratamiento y sus potenciales efectos adversos o secundarios. |
| ***Otras consultas reumatológicas*** |  |
| Visita en domicilio del paciente | Valoración médica, por parte del especialista reumatólogo, realizada en el domicilio del paciente y para situaciones que no requieran de hospitalización, en general, debido a alguna limitación de desplazamiento de éste, por enfermedad y/o motivo social. |
| Visita para la educación al paciente | Reunión médica, entre personal sanitario y pacientes, individuales o en grupo, cuyo objetivo es facilitar información al paciente acerca de qué hacer y cómo actuar ante los problemas que la patología reumatológica plantea (en cuanto a dolor, discapacidad, temores o dudas, trastornos anímicos), habilidades genéricas que permitan la toma de decisiones respecto a las fluctuaciones de la actividad de la enfermedad y de la discapacidad que comporta, así como instrucción respecto a programas de ejercicio físico adecuados y encaminados a la mejora de la enfermedad y, en general, del estado de salud |
| Visita de examen/informe médico legal | Valoración médica, por parte del especialista reumatólogo, cuyo objetivo es la redacción de un informe médico acerca del proceso reumatológico que el paciente padece y por el que es seguido por dicho especialista, que ha sido solicitado por algún tipo de requerimiento conforme a la ley. |
| Visita a distancia | Valoración médica, por parte del especialista reumatólogo, consistente en el intercambio de información entre lugares físicamente separados y a través de algún tipo de tecnología de telecomunicación, con el fin de mejorar el estado de salud del paciente. |

Tabla 2. Actos médicos, diagnósticos y terapéuticos en Reumatología: pruebas diagnósticas.

| ***Pruebas diagnósticas*** | ***Definición*** |
| --- | --- |
| Valoración test de calidad de vida | Interpretación del resultado, expresado generalmente en forma de puntuación, que ofrece un cuestionario específicamente desarrollado y validado para ponderar el efecto que ejerce una enfermedad crónica sobre la calidad de vida de un paciente- a grandes rasgos, se valoran los siguientes aspectos: bienestar físico y material, capacidad de relación, actividad social o comunitaria, desarrollo personal y ocio. Habitualmente, a mayor puntuación peor es la calidad de vida del paciente debido a su enfermedad crónica. |
| Valoración test de psicopatología | Interpretación del resultado, expresado generalmente en forma de puntuación, que ofrece un cuestionario específicamente desarrollado y validado para ponderar la presencia e intensidad de trastornos mentales en las enfermedades crónicas- básicamente, alteraciones anímicas. Habitualmente, a mayor puntuación peor es la salud mental del paciente debido a su enfermedad crónica. |
| Valoración test de impacto funcional | Interpretación del resultado, expresado generalmente en forma de puntuación, que ofrece un cuestionario específicamente desarrollado y validado para ponderar qué efecto tiene la enfermedad crónica sobre la vida del paciente- sus actividades o quehaceres, en particular. Habitualmente, a mayor puntuación peor desarrolla el paciente sus actividades debido a su enfermedad crónica. |
| Valoración test de dolor y fatiga | Interpretación del resultado, expresado generalmente en forma de puntuación, que ofrece un cuestionario específicamente desarrollado y validado para ponderar la presencia e intensidad de dolor y/o fatiga en las enfermedades crónicas. Habitualmente, a mayor puntuación, más dolor y/o fatiga padece el paciente debido a su enfermedad crónica. |
| Realización test de Schirmer | Técnica diagnóstica consistente en la medición del volumen de producción lacrimal mediante papel de filtro específico. Se emplea en la sospecha y evaluación del síndrome del ojo seco. |
| Artrocentesis | Procedimiento quirúrgico menor consistente en la punción de una articulación y aspiración de líquido sinovial, con fines diagnósticos (mediante análisis) o terapéuticos (evacuación de dicho líquido con o sin infiltración de fármaco, generalmente antiinflamatorio o analgésico). |
| Artrocentesis con control ecográfico | Procedimiento quirúrgico menor consistente en la punción de una articulación y aspiración de líquido sinovial, con fines diagnósticos (mediante análisis) o terapéuticos (evacuación de dicho líquido con o sin infiltración de fármaco, generalmente antiinflamatorio y/o analgésico). Se efectúa, en el caso que nos ocupa, con guía visual ecográfica. |
| Artrocentesis con control radioscópico | Procedimiento quirúrgico menor consistente en la punción de una articulación y aspiración de líquido sinovial, con fines diagnósticos (mediante análisis) o terapéuticos (evacuación de dicho líquido con o sin infiltración de fármaco, generalmente antiinflamatorio y/o analgésico). Se efectúa, en el caso que nos ocupa, con guía visual radioscópica. |
| Análisis de líquido sinovial (estudio de cristales) | Técnica diagnóstica realizada mediante microscopio de luz polarizada, consistente en el análisis de los microcristales y la celularidad presentes en una muestra de líquido sinovial, en casos de sospecha de numerosas artropatías, sobre todo microcristalinas e inflamatorias. |
| Biopsia sinovial | Procedimiento quirúrgico menor, realizado mediante punción a ciegas o por artroscopia, cuyo objetivo es la obtención de suficiente muestra tisular sinovial para la valoración diagnóstica, generalmente anátomo-patológica, en casos de artropatías diversas de causa no determinada, habitualmente inflamatorias y ocasionalmente infecciosas. |
| Biopsia nervio sural | Procedimiento quirúrgico menor cuyo objetivo es la obtención de muestra tisular suficiente del nervio sural para permitir un diagnóstico anátomo-patológico en casos de sospecha de neuropatía periférica. |
| Biopsia muscular | Procedimiento quirúrgico menor cuyo objetivo es la obtención de suficiente muestra tisular muscular para la valoración diagnóstica anátomo-patológica en casos de sospecha de enfermedad muscular. |
| Biopsia ósea | Procedimiento quirúrgico menor cuyo objetivo es la obtención de una muestra de tejido óseo para la valoración diagnóstica pertinente ante la sospecha de patología ósea (especialmente malignidad), enfermedades metabólicas óseas y osteodistrofía renal o enfermedades infecciosas. |
| Biopsia piel | Procedimiento quirúrgico menor seguro y relativamente sencillo, cuyo objetivo es la obtención de una muestra tisular cutánea suficiente que permita la valoración diagnóstica, anátomo-patológica, especialmente, de lesiones cutáneas. Ocasionalmente, presenta utilidad terapéutica al conseguir extirpar la lesión por completo. |
| Biopsia grasa subcutánea | Técnica que consiste en la aspiración de suficiente muestra tisular grasa subcutánea, en abdomen, para la valoración diagnóstica anátomo-patológica en casos de sospecha de amiloidosis. |
| Biopsia glándula salival | Procedimiento quirúrgico menor cuya finalidad es la obtención de muestra tisular suficiente de glándulas salivares para valoración diagnóstica anátomo-patológica en alguna de las tres siguientes sospechas: síndrome seco, síndrome de Sjögren o alguna otra enfermedad sistémica. |
| Biopsia arteria temporal | Procedimiento quirúrgico menor cuyo objetivo es la obtención de una muestra tisular de arteria temporal superficial para la valoración diagnóstica anatomo-patológica, en caso de sospecha de arteritis de células gigantes. |
| Ecografía músculo-esquelética | Técnica de ultrasonidos, no invasiva, no ionizante y segura, empleada con fines diagnósticos, terapéuticos y evolutivos, en numerosas patologías de músculos, articulaciones, tejidos periarticulares y blando en general, muy especialmente en al ámbito de la Reumatología, la traumatología y rehabilitación. |
| Capilaroscopia | Técnica de microscopía óptica, sencilla, no invasiva, reproducible y de alta sensibilidad que permite el examen, in vivo, de la morfología capilar y microcirculatoria en el lecho ungueal y, así, la evaluación de las anomalías microvasculares en entidades autoinmunes sistémicas- muy especialmente, fenómeno de Raynaud y esclerodermia. |
| Densitometría ósea | Técnica de absorciometría dual de rayos X que permite calcular el contenido mineral óseo, medida de soporte para ponderar el riesgo de fractura del sujeto. |
| Ecografía carotidea | Técnica de ultrasonidos utilizada para evaluar el riesgo vascular del paciente por medición de los grosores de las capas de la pared de la carótida, presencia de placas de ateroma y estenosis de la luz vascular. |

Tabla 3. Actos médicos, diagnósticos y terapéuticos en Reumatología: técnicas terapéuticas.

| ***Técnicas terapéuticas*** | ***Definición*** |
| --- | --- |
| Artrocentesis e inyección intraarticular | Procedimiento quirúrgico menor, consistente en la punción de una articulación para la infiltración de algún tipo de fármaco, generalmente antiinflamatorio y/o analgésico. |
| Inyección intraarticular con control ecográfico | Procedimiento quirúrgico menor, consistente en la punción de una articulación para la infiltración de algún tipo de fármaco, generalmente antiinflamatorio y/o analgésico. Se efectúa, en el caso que nos ocupa, con guía visual ecográfica. |
| Inyección intraarticular con control radioscópico | Procedimiento quirúrgico menor, consistente en la punción de una articulación para la infiltración de algún tipo de fármaco, generalmente antiinflamatorio y/o analgésico. Se efectúa, en el caso que nos ocupa, con guía visual radioscópica. |
| Infiltración de partes blandas (tendinosa,  ligamentaria, fascial o muscular) | Procedimiento quirúrgico menor consistente en la punción de alguna parte blanda para la inyección de algún tipo de fármaco, generalmente antiinflamatorio y/o analgésico. |
| Inyección epidural lumbar | Técnica intervencionista, consistente en la infiltración de medicamentos corticoides y anestésicos locales en el espacio epidural de la columna lumbar con el objetivo de combatir, mediante el efecto antiinflamatorio de los primeros y analgésico de los segundos, el dolor en determinados casos de lumbalgia y/o radiculalgia lumbar crónicas. También puede realizarse con fines diagnósticos, determinando el origen del dolor. |
| Inyección epidural cervical | Técnica intervencionista, consistente en la infiltración de medicamentos corticoides y anestésicos locales en el espacio epidural de la columna cervical con el objetivo de combatir, mediante el efecto antiinflamatorio de los primeros y analgésico de los segundos, el dolor en determinados casos de cervicalgia y/o radiculalgia cervical crónicas. También puede realizarse con fines diagnósticos, determinando el origen del dolor. |
| Inyección lumbar con control radioscópico | Procedimiento quirúrgico menor, consistente en la infiltración de medicamentos corticoides y anestésicos locales en columna lumbar (espacio epidural, articulaciones facetarias, implantes biológicos) con el objetivo de combatir, mediante el efecto antiinflamatorio de los primeros y analgésico de los segundos, el dolor en casos de determinados casos lumbalgia y/o radiculalgia lumbar. Se efectúa, en el caso que nos ocupa, con guía visual radioscópica. |
| Inyección sacroilíaca con control radioscópico | Procedimiento quirúrgico menor, consistente en la punción de la articulación sacroilíaca para la infiltración de algún tipo de fármaco, generalmente antiinflamatorio y/o analgésico, y realizada, en el caso que nos ocupa, con guía visual radioscópica. |
| Inyección intraarticular, artrocentesis o  infiltración infantil con necesidad de sedación | En población pediátrica, procedimiento quirúrgico menor consistente en la punción de una articulación, con o sin aspiración de líquido sinovial, con fines diagnósticos mediante análisis de éste, y/o terapéuticos- evacuación de dicho líquido con o sin infiltración de fármacos, generalmente antiinflamatorio y/o analgésico. En población infantil, se efectúa bajo sedación para minimizar la molestia y la escasa colaboración del paciente. |
| Bloqueo nervioso periférico | Técnica intervencionista, consistente en la infiltración de fármaco en zona adyacente a un nervio periférico, con fines anestésicos o analgésicos y fines terapéuticos y/o diagnósticos. |
| Radiosinovectomía sin control radioscópico  (rodilla) | Procedimiento quirúrgico menor, consistente en la inyección intraarticular de pequeñas cantidades de radioisótopo, con el objetivo de conseguir la ablación sinovial mediante radiación como tratamiento en diversas artropatías, sobre todo inflamatorias crónicas. |
| Radiosinovectomía con control radioscópico  o ecográfico | Procedimiento quirúrgico menor, consistente en la inyección intraarticular de pequeñas cantidades de radioisótopo, con el objetivo de conseguir la ablación sinovial mediante radiación como tratamiento en diversas artropatías, sobre todo inflamatorias crónicas. Se efectúa, en el caso que nos ocupa, con guía visual radioscópica o ecográfica. |
| Inyección de implantes biológico  intraarticulares | Procedimiento quirúrgico menor, consistente en la infiltración, dentro de la articulación, de algún biomaterial o producto biológico regenerativo (plasma rico en plaquetas, ácido hialurónico, factores de crecimiento óseo, cemento óseo inyectable y otros sustitutos óseos) con el fin de facilitar la reconstrucción y curación en diversas artropatías- especialmente degenerativas y relacionadas con el deporte. |
| Tratamiento de lesiones de partes blandas.  Inmovilización | Procedimiento terapéutico conservador consistente en la estabilización en reposo de alguna parte blanda lesionada mediante vendajes o algún otro tipo de soporte externo. |
| Lavado de calcificaciones Eco Guiado | Procedimiento quirúrgico menor, realizado mediante guía visual ecográfica, consistente en la punción de una parte blanda, generalmente periarticular, afectada por calcificaciones para proceder a su rotura o disolución a través de infusión de suero salino ayudado, en ocasiones, por la propia aguja de punción. Se realiza aspiración posterior del material cálcico desestructurado. |
| Tratamiento plasma rico en plaquetas (PRP),  con extracción y centrifugado y ECO guiado | Procedimiento quirúrgico menor utilizado en diferentes entidades músculo-esqueléticas- tanto de partes blandas como osteo-articulares y del ámbito reumatológico, traumatológico y de la medicina deportiva, consistente en la infiltración de pequeñas cantidades de plasma autólogo enriquecido en plaquetas mediante centrifugación, con el objetivo de acelerar la vascularización, la curación de partes blandas, reducir la morbilidad postoperatoria e intensificar la regeneración ósea por medio- todo ello- de los factores de crecimiento que dichas plaquetas aportan. Se efectúa, en el caso que nos ocupa, con guía visual ecográfica. |
| Informe clínico de minusvalía | Exposición o descripción, que realiza el especialista reumatólogo, referente al caso de un paciente afecto de patología reumatológica de algún tipo, con el fin de permitir valorar- a las instancias pertinentes- si dicho paciente es candidato a un invalidez. |
| Informe pericial | Dictamen que realiza el especialista reumatólogo y en calidad de tal, acerca de alguna cuestión o caso del ámbito de la Reumatología y por motivos legales. |

Tabla 4. Nomenclátor de actos en Reumatología. Organización Médico Colegial.

| CONSULTAS Y VISITAS |
| --- |
| Consulta |
| Revisión |
| Asistencia a enfermo hospitalizado, ingreso no quirúrgico, primer día |
| Asistencia a enfermo hospitalizado, ingreso no quirúrgico, 2ª y 3ª día |
| Asistencia a enfermo hospitalizado, ingreso no quirúrgico, del 4 a 7 día |
| Asistencia a enfermo hospitalizado, ingreso no quirúrgico, octavo día y sucesivos |
| Visita a domicilio |
| Visita a hospital |
| PRUEBAS DE DIAGNOSTICO |
| Biopsia cutánea, subcutánea y mucosa (extracción de pieza de estudio) |
| Biopsia muscular o tendinosa |
| Capilaroscopia |
| Ecografía articular (incluyendo cadera) |
| Ecografía muscular y tendinosa |
| Líquido articular. Estudio microscópico |
| ACTOS TERAPEUTICOS |
| Biopsia de glándula salival |
| Biopsia sinovial. Por punción |
| Inyección de implantes biológicos intraarticulares |
| Punción evacuadora (Artrocentesis, bolsas sinoviales). Biopsia |
| Sinoviortesis radiactiva con Y-90 (por infiltración) |
| Tratamientos de lesiones de partes blandas articulares. Inmovilización |
